# Supplementary material for: Fetal Tissue-Derived Mast Cells (MC) as Experimental Surrogate for In Vivo Connective Tissue MC
Source: MDPI journal article supplement (doi:10.3390/cells11060928), 2022-03-08
Supplement: s1 [file s1]

| Primer | Forward primer (Sequence 5'-3') | Reverse Primer (Sequence 5'-3') |
|--------|---------------------------------|---------------------------------|
| Mcpt1  | GGAAAACTGGAGAGAAAGAACCTAC       | GACAGCTGGGACAGAATGGGG           |
| Mcpt2  | ATTCATTGCCTAGTTCCTCTGAC         | AGGATGAGAACAGGCTGGGAT           |
| Mcpt4  | GACAGAATCCACACAGCAGAAG          | CCTCCAGAGTCTCCCTTGTATG          |
| Mcpt5  | GGCAGAACAAACGTGAATGAGCC         | AAGAACCTTCTGGAAGCTCAGGG         |
| Mcpt6  | GCTCCTCTCTTTGAACCGGATC          | GGTGGGAGAGGCTCGTCATTA           |
| Mcpt7  | GGCTGGGGTAACATCGACAAT           | CAAGTAATAGGTGACCCGGGTGTA        |
| Mcpt9  | TTCCAAGTTCAATGACATCGTATTAC      | GATACTTTTTTTCCTCCAGTTCGC        |
| Cpa3   | ACACAGGATCGAATGTGGAG            | TAATGCAGGACTTCATGAGC            |
| TLR1   | ACTATGCTGGTGCTGGCTGT            | CCAGGGCAGGTCAAAGTAGA            |
| TLR2   | GGGGCTTCACTTCTCTGCTT            | AGCATCCTCTGAGATTGACG            |
| TLR3   | GCTCAGAAAGGCCTGGAAAT            | GCCCTTAAAAGCAACAACACTCTG        |
| TLR4   | GGACTCTGATCATGGCACTG            | CTGATCCATGCATTGGTAGGT           |
| TLR5   | GCTACCCAGGTGGCAAGAG             | GCACAGAAAGCATGAAGCTG            |
| TLR6   | CTCACCAGAGGTCCAACCTT            | CGAGCACTTCCAGGTTGTTT            |
| TLR7   | AAACTCAGCTGTGACAGAATGG          | TCTTGATCTTCCAATTTGC             |
| TLR9   | GAATCCTCCATCTCCCAACA            | CCAGAGTCTCAGCCAGCACT            |
| Actin  | CTAAGGCCAACCGTGAAAAG            | ACCAGAGGCATACAGGGACA            |
